# Supplementary material
Source: PubMed Central journal article supplement (PMC4868188)

# Supplemental Figure 1

A. Higher occurrence with nicotine treatment

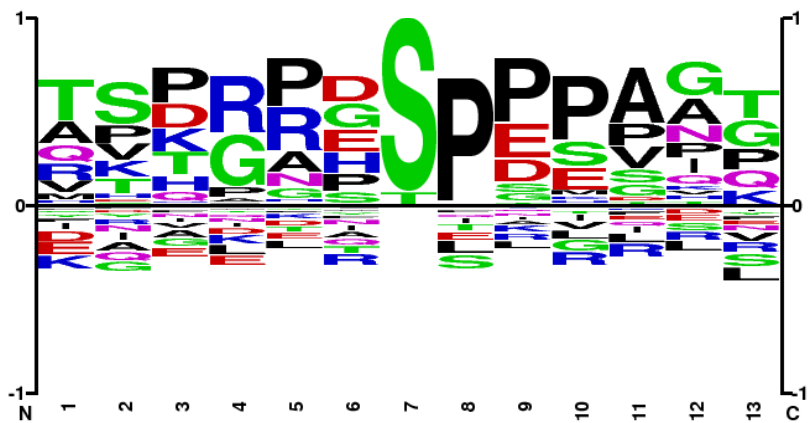

B. Lower occurrence with nicotine treatment

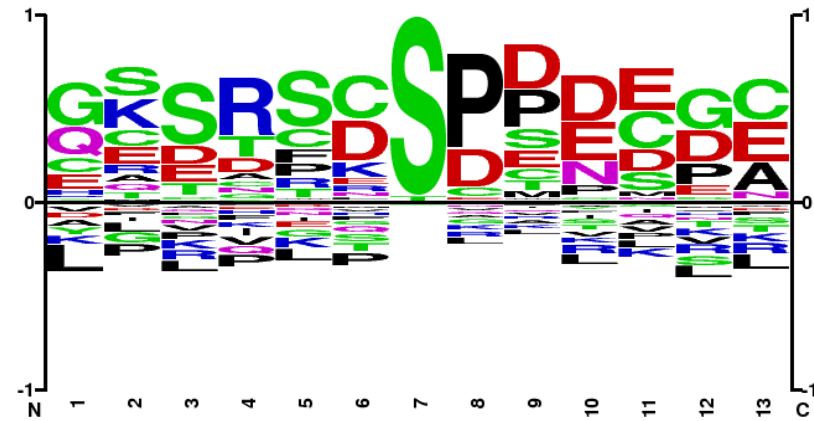

C. Higher occurrence with  $\alpha$ -bungarotoxin treatment

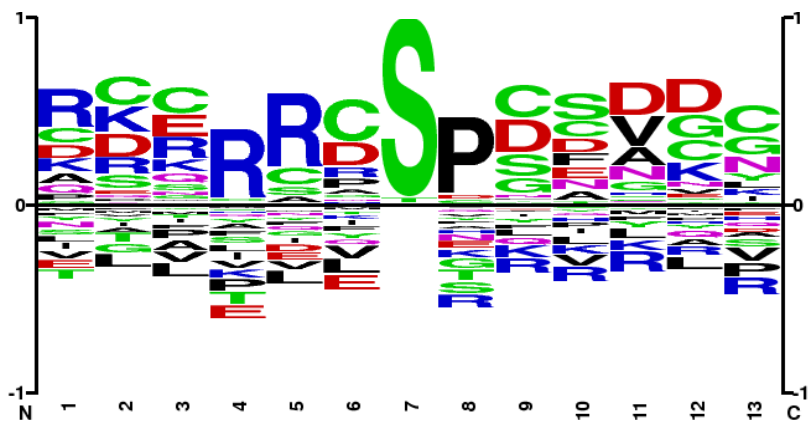

D. Lower occurrence with  $\alpha$ -bungarotoxin treatment

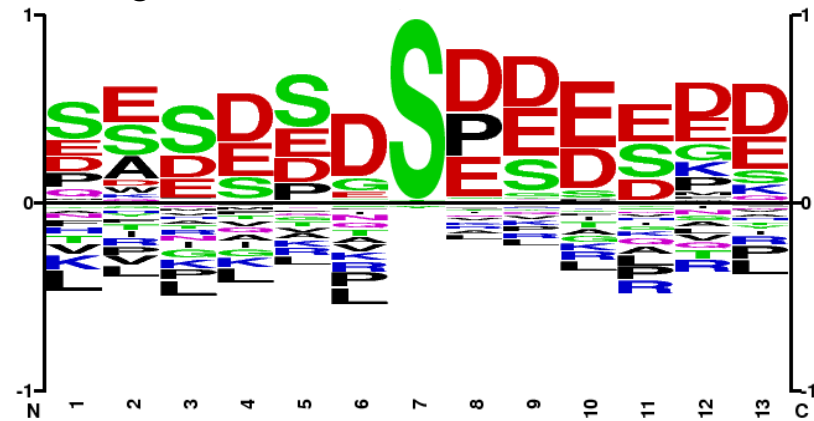

Supplement: NIHMS779773-supplement-SFigure1.pdf [file NIHMS779773-supplement-SFigure1.pdf]
